# Supplementary material
Source: PubMed Central journal article supplement (PMC5340569)
Supplement: NIHMS825456-supplement-Supplemental_Material.pdf [file NIHMS825456-supplement-Supplemental_Material.pdf]

Supplementary Materials for  
Evidence for SNP-SNP interaction identified through targeted sequencing of cleft  
case-parent trios

by

Yanzi Xiao<sup>1</sup>, Margaret A. Taub<sup>2</sup>, Ingo Ruczinski<sup>2</sup>, Ferdouse Begum<sup>1</sup>, Jacqueline  
B. Hetmanski<sup>1</sup>, Holger Schwender<sup>3</sup>, Elizabeth J. Leslie<sup>4</sup>, Mary L. Marazita<sup>4</sup>,  
Jeffrey C. Murray<sup>5</sup>, Daniel C. Koboldt<sup>6</sup>, Terri H. Beaty<sup>1</sup>

1. Department of Epidemiology, School of Public Health, Johns Hopkins University, Baltimore MD, USA 21205
2. Department of Biostatistics, School of Public Health, Johns Hopkins University, Baltimore MD, USA 21205
3. Mathematical Institute, Heinrich Heine University, Düsseldorf, Germany.
4. Center for Craniofacial and Dental Genetics, Department of Oral Biology, School of Dental Medicine, University of Pittsburgh, Pittsburgh, PA, USA
5. Department of Pediatrics, Carver College of Medicine, University of Iowa, Iowa City, Iowa, USA
6. The Genome Institute, Washington University School of Medicine, St. Louis, Missouri, USA

**Supplementary Table I Most significant results from the 4 df Likelihood Ratio Test for GxG interaction in 375 European case-parent trios**

| First Gene | Second Gene | Marker 1   | Marker 2   | Test Statistic | p-value  | Permutation p-value |
|------------|-------------|------------|------------|----------------|----------|---------------------|
| 8q24       | ARHGAP29    | rs1356762  | rs61782236 | 20.037         | 0.000491 | 0.79                |
| 8q24       | BMP4        | rs4236742  | rs2224835  | 13.676         | 0.008404 | 0.97                |
| 8q24       | FGFR2       | rs1464154  | rs10886946 | 19.885         | 0.000526 | 0.61                |
| 8q24       | FOXE1       | rs72730212 | rs16923269 | 25.354         | 4.27E-05 | 0.1                 |
| 8q24       | IRF6        | rs4602853  | rs28630860 | 17.694         | 0.001416 | 0.9                 |
| 8q24       | MAFB        | rs6470670  | rs3092775  | 28.050         | 1.22E-05 | 0.05                |
| 8q24       | MSX1        | rs12676542 | rs2220746  | 20.167         | 0.000463 | 0.62                |
| 8q24       | NOG         | rs1372992  | rs12450049 | 19.833         | 0.000539 | 0.74                |
| 8q24       | NTN1        | rs13265167 | rs7207143  | 21.154         | 0.000295 | 0.81                |
| 8q24       | PAX7        | rs13251901 | rs4075768  | 20.067         | 0.000485 | 0.9                 |
| 8q24       | PTCH1       | rs13249571 | rs62558314 | 24.087         | 7.67E-05 | 0.14                |
| 8q24       | VAX1        | rs10090304 | rs1681736  | 22.295         | 0.000175 | 0.39                |
| ARHGAP29   | BMP4        | rs12121974 | rs12883570 | 16.541         | 0.002373 | 0.7                 |
| ARHGAP29   | FGFR2       | rs17394161 | rs10466213 | 21.451         | 0.000258 | 0.41                |
| ARHGAP29   | FOXE1       | rs472908   | rs2120263  | 21.102         | 0.000302 | 0.46                |
| ARHGAP29   | IRF6        | rs11165073 | rs74487756 | 20.673         | 0.000368 | 0.5                 |
| ARHGAP29   | MAFB        | rs2022395  | rs6065286  | 22.125         | 0.000189 | 0.51                |
| ARHGAP29   | MSX1        | rs4147848  | rs730575   | 29.005         | 7.80E-06 | 0.03                |
| ARHGAP29   | NOG         | rs1761375  | rs227688   | 21.818         | 0.000218 | 0.47                |

| First Gene | Second Gene | Marker 1   | Marker 2   | Test Statistic | p-value  | Permutation p-value |
|------------|-------------|------------|------------|----------------|----------|---------------------|
| ARHGAP29   | NTN1        | rs1765622  | rs7222455  | 20.511         | 0.000396 | 0.88                |
| ARHGAP29   | PAX7        | rs1320502  | rs4920501  | 22.646         | 0.000149 | 0.58                |
| ARHGAP29   | PTCH1       | rs12088309 | rs357542   | 19.429         | 0.000647 | 0.66                |
| ARHGAP29   | VAX1        | rs762485   | rs2921962  | 23.745         | 8.98E-05 | 0.28                |
| BMP4       | FGFR2       | rs4243595  | rs12256320 | 14.272         | 0.006476 | 0.88                |
| BMP4       | FOXE1       | rs8014363  | rs7033765  | 18.611         | 0.000937 | 0.31                |
| BMP4       | IRF6        | rs2761884  | rs1983614  | 20.174         | 0.000461 | 0.16                |
| BMP4       | MAFB        | rs11157993 | rs3092011  | 19.550         | 0.000612 | 0.34                |
| BMP4       | MSX1        | rs72680512 | rs4689186  | 18.760         | 0.000876 | 0.34                |
| BMP4       | NOG         | rs12587398 | rs12951993 | 17.365         | 0.001641 | 0.53                |
| BMP4       | NTN1        | rs8014363  | rs7208881  | 17.710         | 0.001406 | 0.71                |
| BMP4       | PAX7        | rs8014363  | rs1537843  | 15.167         | 0.004367 | 0.96                |
| BMP4       | PTCH1       | rs11157993 | rs11793640 | 19.277         | 0.000693 | 0.23                |
| BMP4       | VAX1        | rs8014071  | rs1638673  | 18.615         | 0.000935 | 0.41                |
| FGFR2      | FOXE1       | rs1696835  | rs10739476 | 19.905         | 0.000521 | 0.44                |
| FGFR2      | IRF6        | rs2420941  | rs845451   | 20.600         | 0.00038  | 0.33                |
| FGFR2      | MAFB        | rs10886928 | rs6016377  | 20.190         | 0.000458 | 0.61                |
| FGFR2      | MSX1        | rs4752571  | rs4435686  | 19.468         | 0.000636 | 0.53                |
| FGFR2      | NOG         | rs4752571  | rs11654202 | 20.942         | 0.000325 | 0.4                 |
| FGFR2      | NTN1        | rs10466213 | rs61409745 | 20.079         | 0.000482 | 0.74                |
| FGFR2      | PAX7        | rs10510099 | rs626600   | 21.580         | 0.000243 | 0.53                |

| First Gene  | Second Gene | Marker 1         | Marker 2         | Test Statistic | p-value         | Permutation p-value |
|-------------|-------------|------------------|------------------|----------------|-----------------|---------------------|
| FGFR2       | PTCH1       | rs35462105       | rs357521         | 15.749         | 0.003375        | 0.95                |
| FGFR2       | VAX1        | rs34143724       | rs11593912       | 20.616         | 0.000377        | 0.46                |
| FOXE1       | IRF6        | rs12001675       | rs633352         | 17.450         | 0.00158         | 0.78                |
| FOXE1       | MAFB        | rs3780419        | rs3092011        | 20.629         | 0.000375        | 0.56                |
| FOXE1       | MSX1        | rs1475695        | rs13117093       | 20.500         | 0.000398        | 0.41                |
| FOXE1       | NOG         | rs13049          | rs8074637        | 16.678         | 0.002232        | 0.94                |
| FOXE1       | NTN1        | rs10984601       | rs7215971        | 20.930         | 0.000327        | 0.66                |
| FOXE1       | PAX7        | rs12349452       | rs61761365       | 21.464         | 0.000256        | 0.56                |
| FOXE1       | PTCH1       | rs6478391        | rs1889617        | 14.934         | 0.004839        | 0.98                |
| FOXE1       | VAX1        | rs10984977       | rs181512         | 16.489         | 0.002428        | 0.96                |
| <b>IRF6</b> | <b>MAFB</b> | <b>rs6681355</b> | <b>rs6029315</b> | <b>40.255</b>  | <b>3.83E-08</b> | <b>&lt;0.001</b>    |
| IRF6        | MSX1        | rs1983614        | rs6851263        | 17.965         | 0.001254        | 0.73                |
| IRF6        | NOG         | rs590152         | rs2159226        | 25.014         | 5.00E-05        | 0.09                |
| IRF6        | NTN1        | rs599021         | rs181533         | 22.893         | 0.000133        | 0.37                |
| IRF6        | PAX7        | rs2484030        | rs10907314       | 25.723         | 3.60E-05        | 0.1                 |
| IRF6        | PTCH1       | rs590152         | rs357565         | 18.197         | 0.001129        | 0.63                |
| IRF6        | VAX1        | rs4421592        | rs3010467        | 19.968         | 0.000507        | 0.56                |
| MAFB        | MSX1        | rs6029145        | rs6851263        | 26.748         | 2.23E-05        | 0.06                |
| MAFB        | NOG         | rs4812455        | rs10852990       | 19.657         | 0.000584        | 0.77                |
| MAFB        | NTN1        | rs6029421        | rs8081873        | 32.174         | 1.76E-06        | 0.02                |
| MAFB        | PAX7        | rs6029182        | rs11584404       | 31.253         | 2.72E-06        | 0.02                |
| MAFB        | PTCH1       | rs6102167        | rs10990303       | 21.285         | 0.000278        | 0.42                |

| First Gene | Second Gene | Marker 1   | Marker 2   | Test Statistic | p-value  | Permutation p-value |
|------------|-------------|------------|------------|----------------|----------|---------------------|
| MAFB       | VAX1        | rs6072087  | rs11197835 | 17.749         | 0.001381 | 0.97                |
| MSX1       | NOG         | rs2933586  | rs4605230  | 18.376         | 0.001042 | 0.8                 |
| MSX1       | NTN1        | rs2968669  | rs9892906  | 27.966         | 1.27E-05 | 0.05                |
| MSX1       | PAX7        | rs3815544  | rs61760688 | 18.531         | 0.000971 | 0.94                |
| MSX1       | PTCH1       | rs60726571 | rs1932075  | 17.959         | 0.001257 | 0.71                |
| MSX1       | VAX1        | rs2968702  | rs2420309  | 17.204         | 0.001764 | 0.92                |
| NOG        | NTN1        | rs8074637  | rs2315286  | 29.622         | 5.84E-06 | 0.04                |
| NOG        | PAX7        | rs8073455  | rs9439729  | 25.310         | 4.36E-05 | 0.21                |
| NOG        | PTCH1       | rs3867600  | rs357551   | 15.649         | 0.003529 | 0.98                |
| NOG        | VAX1        | rs8069500  | rs10886011 | 17.493         | 0.00155  | 0.94                |
| NTN1       | PAX7        | rs7219272  | rs4075768  | 20.593         | 0.000381 | 0.95                |
| NTN1       | PTCH1       | rs62069969 | rs574688   | 18.484         | 0.000992 | 0.93                |
| NTN1       | VAX1        | rs7214739  | rs2619106  | 21.651         | 0.000235 | 0.67                |
| PAX7       | PTCH1       | rs28441017 | rs28716262 | 18.794         | 0.000863 | 0.89                |
| PAX7       | VAX1        | rs2236799  | rs11197835 | 25.224         | 4.54E-05 | 0.21                |
| PTCH1      | VAX1        | rs4742697  | rs77204400 | 23.847         | 8.57E-05 | 0.14                |

**Supplementary Table II Most significant results from the 4df Likelihood Ratio Test for GxG interaction in 1,034 Asian case-parent trios**

| First Gene | Second Gene | Marker 1   | Marker 2   | Test Statistic | p-value  | Permutation p-value |
|------------|-------------|------------|------------|----------------|----------|---------------------|
| 8q24       | ARHGAP29    | rs873232   | rs3789398  | 25.819         | 3.44E-05 | 0.1                 |
| 8q24       | BMP4        | rs7845615  | rs3742556  | 17.763         | 0.001373 | 0.75                |
| 8q24       | FGFR2       | rs1464154  | rs11200102 | 21.989         | 0.000201 | 0.54                |
| 8q24       | FOXE1       | rs72609875 | rs12352658 | 20.460         | 0.000405 | 0.47                |
| 8q24       | IRF6        | rs10111530 | rs6540559  | 24.945         | 5.16E-05 | 0.14                |
| 8q24       | MAFB        | rs1516960  | rs7509091  | 18.577         | 0.000951 | 0.94                |
| 8q24       | MSX1        | rs1835851  | rs56398386 | 23.657         | 9.36E-05 | 0.12                |
| 8q24       | NOG         | rs9643244  | rs4794668  | 17.262         | 0.001719 | 0.96                |
| 8q24       | NTN1        | rs10956419 | rs2429370  | 24.393         | 6.66E-05 | 0.26                |
| 8q24       | PAX7        | rs55830016 | rs2841087  | 23.506         | 0.0001   | 0.4                 |
| 8q24       | PTCH1       | rs9643244  | rs28716262 | 19.820         | 0.000542 | 0.7                 |
| 8q24       | VAX1        | rs6984251  | rs181505   | 23.873         | 8.47E-05 | 0.26                |
| ARHGAP29   | BMP4        | rs581244   | rs67475977 | 21.206         | 0.000288 | 0.26                |
| ARHGAP29   | FGFR2       | rs3789692  | rs2981451  | 21.681         | 0.000232 | 0.58                |
| ARHGAP29   | FOXE1       | rs582798   | rs12347079 | 20.079         | 0.000482 | 0.49                |
| ARHGAP29   | IRF6        | rs1324214  | rs650854   | 21.460         | 0.000257 | 0.45                |
| ARHGAP29   | MAFB        | rs950283   | rs6072160  | 23.221         | 0.000114 | 0.33                |
| ARHGAP29   | MSX1        | rs4147830  | rs3821949  | 19.450         | 0.000641 | 0.5                 |
| ARHGAP29   | NOG         | rs6674226  | rs8069500  | 19.992         | 0.000501 | 0.65                |

| First Gene | Second Gene | Marker 1   | Marker 2   | Test Statistic | p-value  | Permutation p-value |
|------------|-------------|------------|------------|----------------|----------|---------------------|
| ARHGAP29   | NTN1        | rs2022378  | rs3785995  | 20.210         | 0.000454 | 0.82                |
| ARHGAP29   | PAX7        | rs10874810 | rs9439697  | 19.689         | 0.000575 | 0.89                |
| ARHGAP29   | PTCH1       | rs3761910  | rs2149722  | 29.041         | 7.67E-06 | 0.03                |
| ARHGAP29   | VAX1        | rs6698203  | rs1630816  | 20.966         | 0.000322 | 0.66                |
| BMP4       | FGFR2       | rs2738265  | rs2936861  | 27.408         | 1.64E-05 | 0.03                |
| BMP4       | FOXE1       | rs56312905 | rs1886002  | 19.531         | 0.000618 | 0.32                |
| BMP4       | IRF6        | rs4898820  | rs968033   | 17.506         | 0.001541 | 0.66                |
| BMP4       | MAFB        | rs12895262 | rs6102096  | 19.622         | 0.000593 | 0.54                |
| BMP4       | MSX1        | rs12895262 | rs6823800  | 18.178         | 0.001139 | 0.39                |
| BMP4       | NOG         | rs2147105  | rs8073799  | 18.536         | 0.000969 | 0.53                |
| BMP4       | NTN1        | rs4243595  | rs12602314 | 20.833         | 0.000342 | 0.43                |
| BMP4       | PAX7        | rs6572930  | rs515739   | 22.263         | 0.000178 | 0.28                |
| BMP4       | PTCH1       | rs12895971 | rs10985356 | 19.521         | 0.000621 | 0.4                 |
| BMP4       | VAX1        | rs1951866  | rs877396   | 18.510         | 0.000981 | 0.66                |
| FGFR2      | FOXE1       | rs9420327  | rs58100391 | 19.470         | 0.000635 | 0.68                |
| FGFR2      | IRF6        | rs11200101 | rs12025057 | 22.974         | 0.000128 | 0.33                |
| FGFR2      | MAFB        | rs2936861  | rs6102078  | 20.266         | 0.000442 | 0.87                |
| FGFR2      | MSX1        | rs1896422  | rs2131453  | 19.610         | 0.000596 | 0.58                |
| FGFR2      | NOG         | rs2936874  | rs227725   | 19.411         | 0.000653 | 0.8                 |
| FGFR2      | NTN1        | rs2935693  | rs4791823  | 20.709         | 0.000362 | 0.84                |
| FGFR2      | PAX7        | rs12763463 | rs11488726 | 26.233         | 2.84E-05 | 0.18                |

| First Gene | Second Gene | Marker 1   | Marker 2    | Test Statistic | p-value  | Permutation p-value |
|------------|-------------|------------|-------------|----------------|----------|---------------------|
| FGFR2      | PTCH1       | rs2936864  | rs55952687  | 19.496         | 0.000628 | 0.81                |
| FGFR2      | VAX1        | rs752736   | rs1665668   | 24.303         | 6.94E-05 | 0.27                |
| FOXE1      | IRF6        | rs2417730  | rs12083466  | 18.159         | 0.001149 | 0.73                |
| FOXE1      | MAFB        | rs4743128  | rs2024574   | 22.525         | 0.000158 | 0.24                |
| FOXE1      | MSX1        | rs2417729  | rs80227476  | 19.554         | 0.000611 | 0.34                |
| FOXE1      | NOG         | rs1886002  | rs28664662  | 22.746         | 0.000142 | 0.15                |
| FOXE1      | NTN1        | rs77159549 | rs2551799   | 22.984         | 0.000128 | 0.28                |
| FOXE1      | PAX7        | rs2808685  | rs34988159  | 19.996         | 0.0005   | 0.68                |
| FOXE1      | PTCH1       | rs958346   | rs1335048   | 19.813         | 0.000544 | 0.45                |
| FOXE1      | VAX1        | rs3994138  | rs363312    | 22.100         | 0.000191 | 0.28                |
| IRF6       | MAFB        | rs72649973 | rs2866114   | 17.137         | 0.001818 | 0.98                |
| IRF6       | MSX1        | rs1473683  | rs12639983  | 16.781         | 0.002132 | 0.83                |
| IRF6       | NOG         | rs10863785 | rs12450244  | 18.566         | 0.000956 | 0.81                |
| IRF6       | NTN1        | rs7511737  | rs117996464 | 20.482         | 0.000401 | 0.69                |
| IRF6       | PAX7        | rs12029138 | rs2883890   | 19.869         | 0.00053  | 0.84                |
| IRF6       | PTCH1       | rs1040426  | rs16909974  | 20.903         | 0.000331 | 0.45                |
| IRF6       | VAX1        | rs1883308  | rs17095763  | 22.190         | 0.000184 | 0.4                 |
| MAFB       | MSX1        | rs11907397 | rs1907980   | 21.597         | 0.000241 | 0.29                |
| MAFB       | NOG         | rs2425406  | rs8069500   | 23.784         | 8.82E-05 | 0.23                |
| MAFB       | NTN1        | rs13041631 | rs72809908  | 28.161         | 1.16E-05 | 0.05                |
| MAFB       | PAX7        | rs35929622 | rs4075768   | 21.029         | 0.000312 | 0.82                |



| First Gene | Second Gene | Marker 1   | Marker 2    | Test Statistic | p-value  | Permutation p-value |
|------------|-------------|------------|-------------|----------------|----------|---------------------|
| MAFB       | PTCH1       | rs6016400  | rs117758836 | 19.452         | 0.00064  | 0.81                |
| MAFB       | VAX1        | rs10485671 | rs10736259  | 19.389         | 0.000659 | 0.91                |
| MSX1       | NOG         | rs9291153  | rs7222986   | 24.345         | 6.81E-05 | 0.07                |
| MSX1       | NTN1        | rs12532    | rs2429370   | 21.060         | 0.000308 | 0.43                |
| MSX1       | PAX7        | rs4395446  | rs2236806   | 21.563         | 0.000245 | 0.4                 |
| MSX1       | PTCH1       | rs74485582 | rs34556283  | 17.782         | 0.001362 | 0.72                |
| MSX1       | VAX1        | rs1907980  | rs758367    | 16.334         | 0.002602 | 0.94                |
| NOG        | NTN1        | rs17821518 | rs12452003  | 28.787         | 8.63E-06 | 0.04                |
| NOG        | PAX7        | rs227723   | rs2236832   | 24.742         | 5.67E-05 | 0.22                |
| NOG        | PTCH1       | rs887088   | rs10990355  | 20.542         | 0.00039  | 0.51                |
| NOG        | VAX1        | rs1816806  | rs181505    | 18.961         | 0.0008   | 0.87                |
| NTN1       | PAX7        | rs12452951 | rs6672970   | 21.362         | 0.000268 | 0.81                |
| NTN1       | PTCH1       | rs57675223 | rs10990447  | 24.184         | 7.34E-05 | 0.2                 |
| NTN1       | VAX1        | rs9901367  | rs1468539   | 21.469         | 0.000256 | 0.69                |
| PAX7       | PTCH1       | rs851123   | rs28563972  | 23.429         | 0.000104 | 0.36                |
| PAX7       | VAX1        | rs2223585  | rs1638667   | 22.268         | 0.000177 | 0.62                |
| PTCH1      | VAX1        | rs16909974 | rs3125617   | 21.706         | 0.000229 | 0.47                |
